# Supplementary material
Source: Springer Nature journal article supplement (https://www.springermedizin.de/resource/supplementary/12937_2007_171_MOESM1_ESM.pdf/25654614)

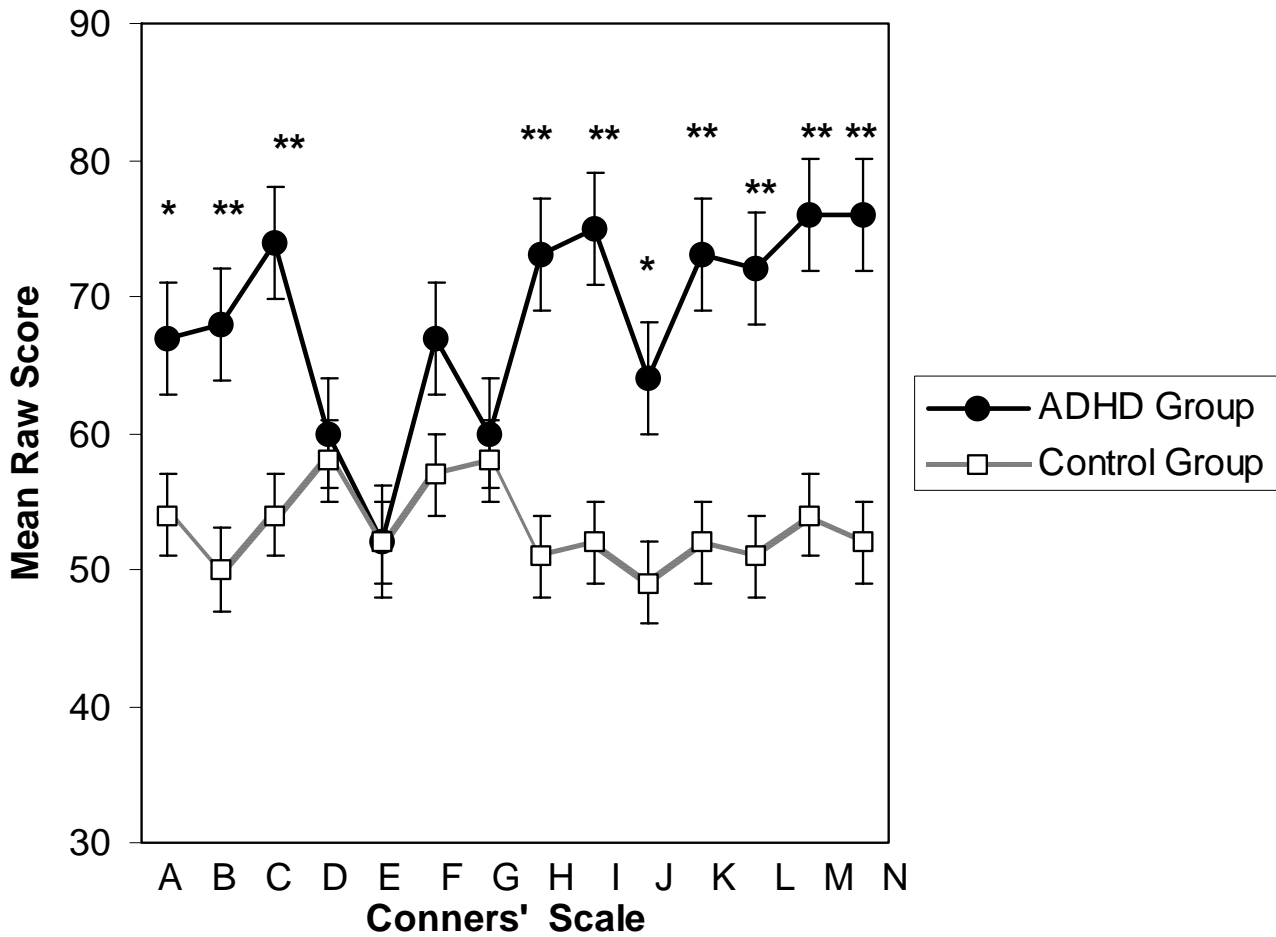

Supplement: MOESM1 [file 25654614]
